# Supplementary material for: Measuring the cellular memory B cell response after vaccination in patients after allogeneic stem cell transplantation
Source: Springer Nature journal article supplement (doi:10.1007/s00277-020-04072-9), 2020-06-09

Supplementary Figure 1

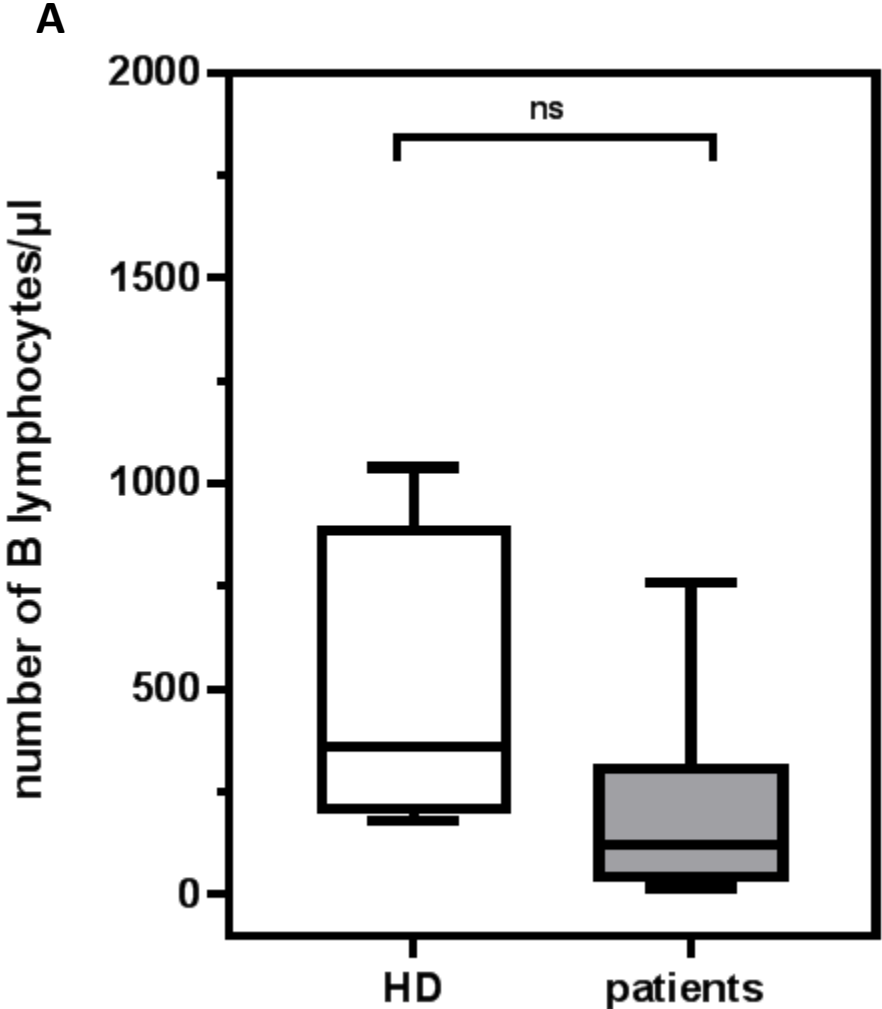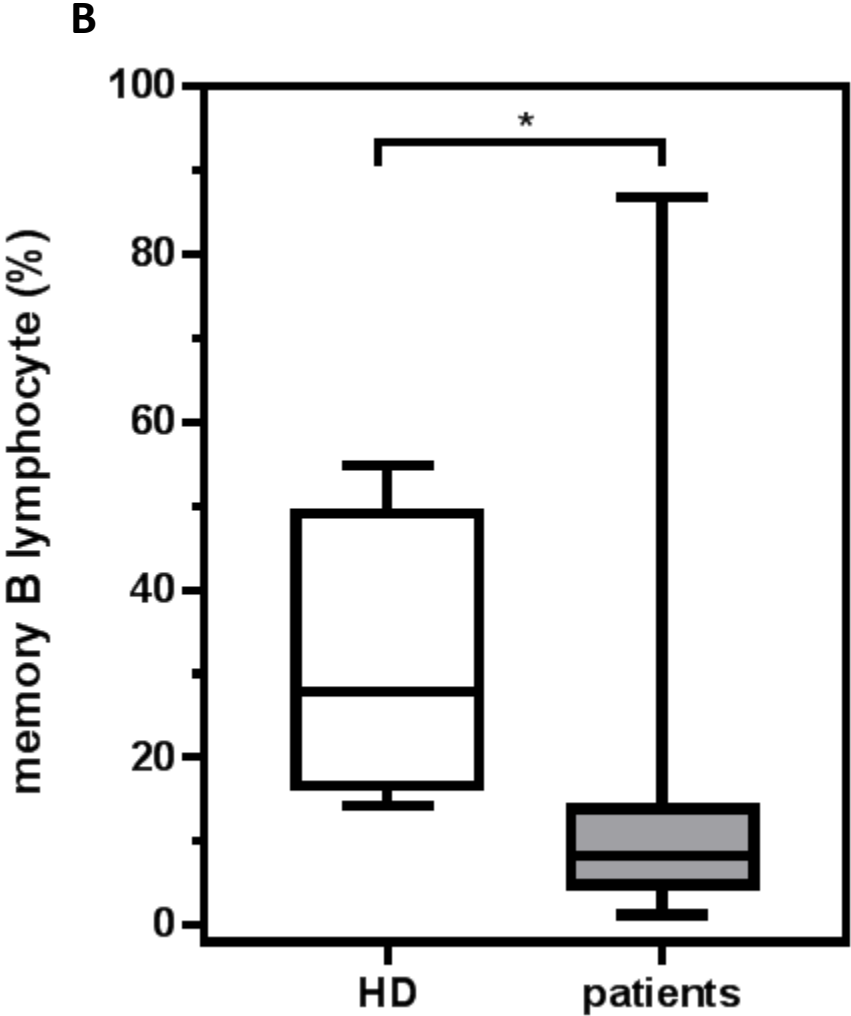

Supplement: MOESM1 [file 18065562]
